# Supplementary material for: Raman spectral characteristics of 4-aminobenzenethiol adsorbed on ZnO nanorod arrays
Source: Royal Society of Chemistry journal article supplement (doi:10.1039/c3cp51204e), 2013-01-01

## Electronic Supplementary Information

### **Raman Spectral Characteristics of 4-Aminobenzenethiol Adsorbed on ZnO Nanorod Arrays**

Kwan Kim,<sup>\*a</sup> Kyung Lock Kim,<sup>a</sup> and Kuan Soo Shin<sup>\*b</sup>

<sup>a</sup>*Department of Chemistry, Seoul National University, Seoul 151-742, Korea. E-mail:*

*kwankim@snu.ac.kr; Fax: +82 2 889 1568; Tel: +82 2 880 6651*

<sup>b</sup>*Department of Chemistry, Soongsil University, Seoul 156-743, Korea. E-mail:*

*kshin@ssu.ac.kr; Fax: +82 2 824 4383; Tel: +82 2 820 0436.*

**Fig. S1** XRD pattern of ZnO nanorod arrays grown for 2.5 h.

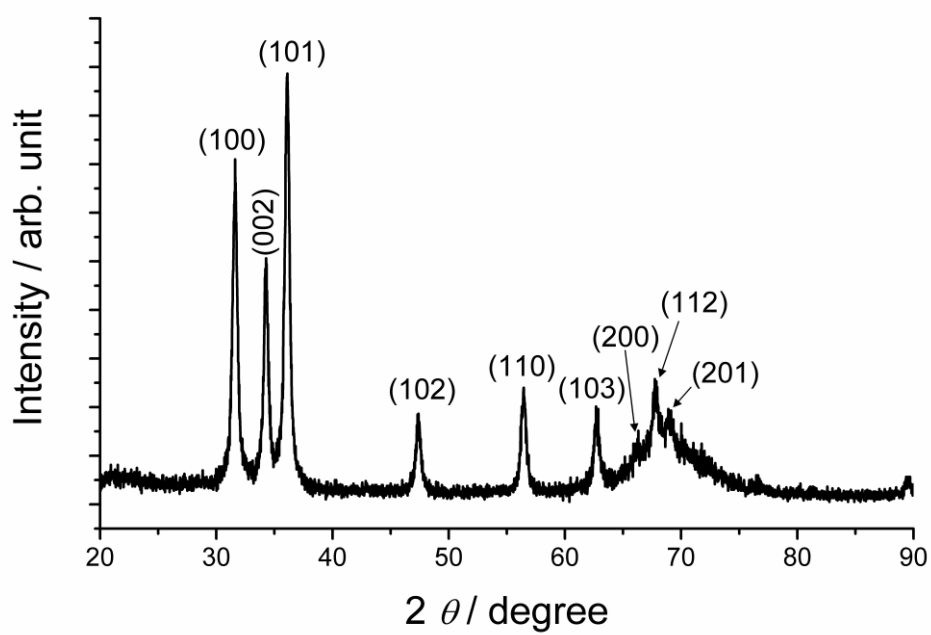

**Fig. S2** UV/vis spectrum of ZnO nanorod arrays grown for 2.5 h.

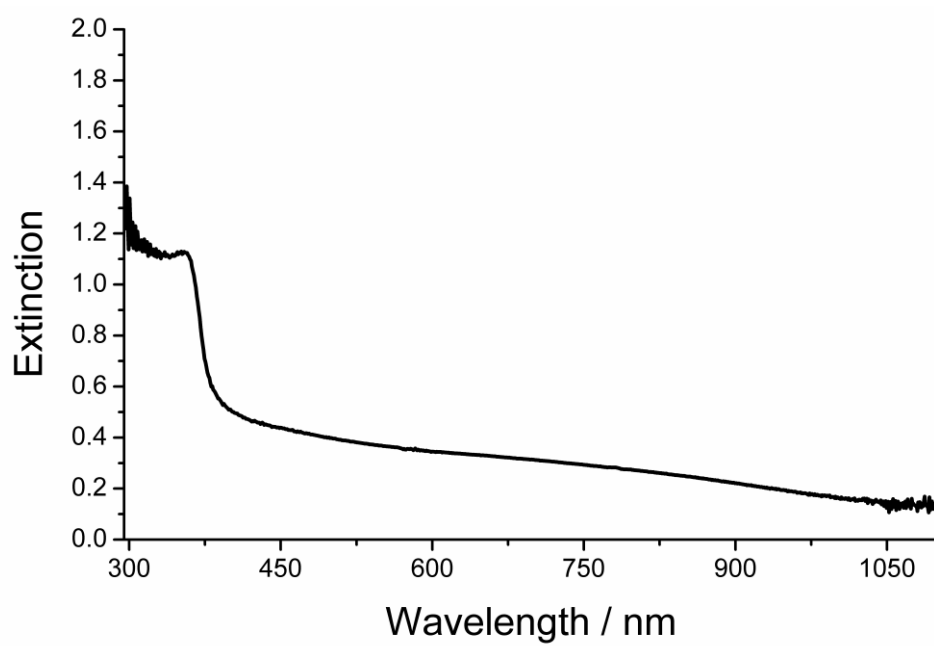

**Fig. S3** XRD pattern of Zn-4ABT salt.

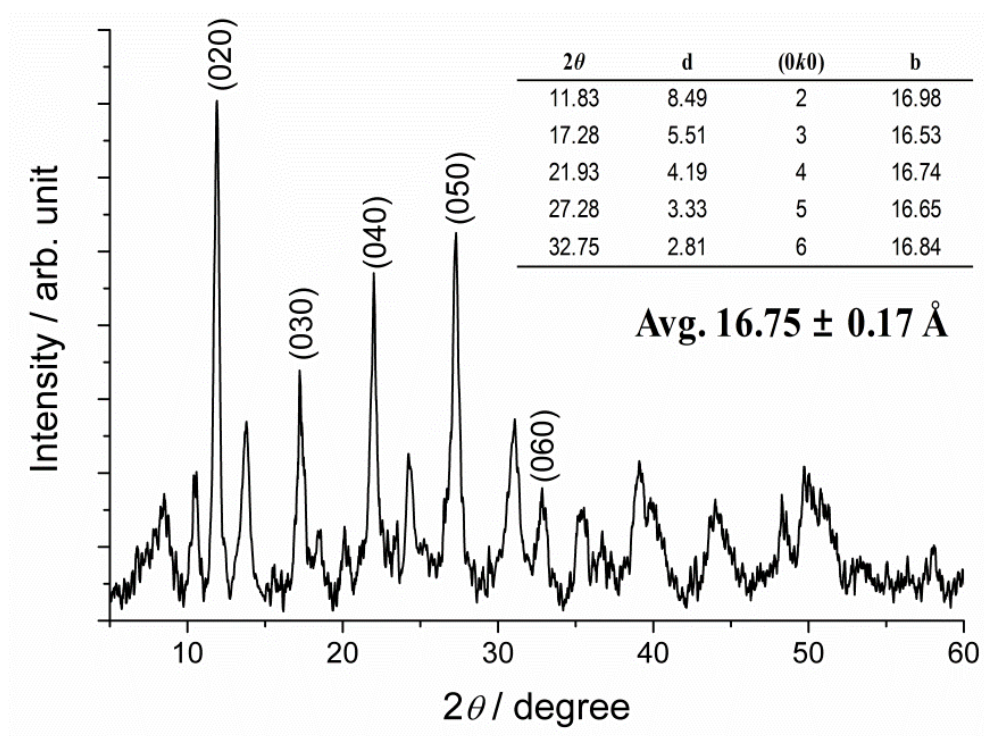

**Fig. S4** CVs of ZnO/ITO and 4-ABT adsorbed on ZnO/ITO glass in 0.1 M NaClO<sub>4</sub> solution.

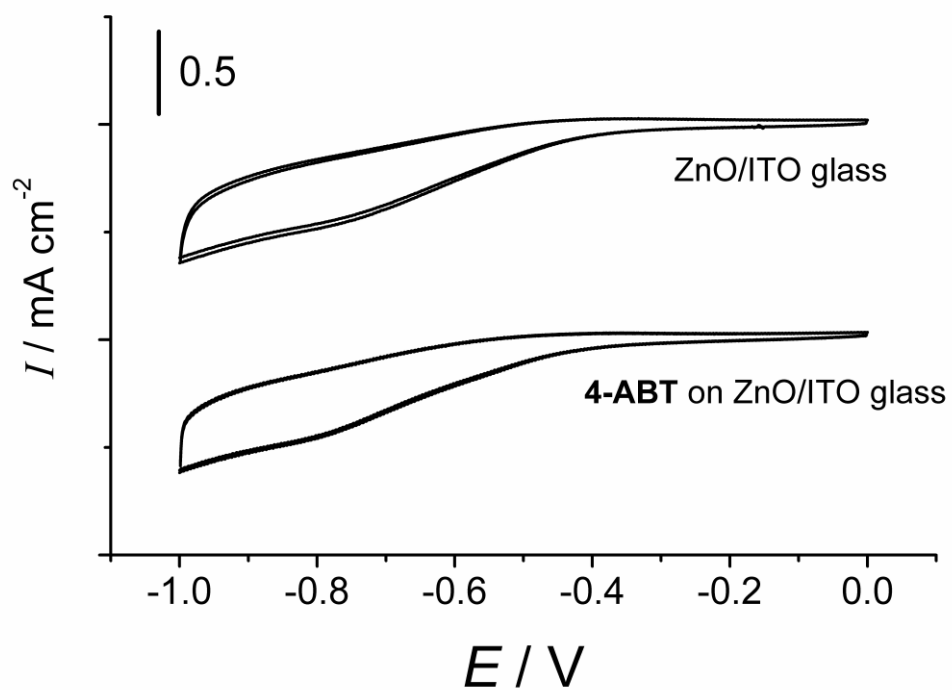

Supplement: c3cp51204e.pdf [file c3cp51204e.pdf]
